# Supplementary material for: Macrophage interferon regulatory factor 4 deletion ameliorates aristolochic acid nephropathy via reduced migration and increased apoptosis
Source: PubMed Central journal article supplement (PMC8876461; doi:10.1172/jci.insight.150723), 2022-02-22

Supplemental Figure 1

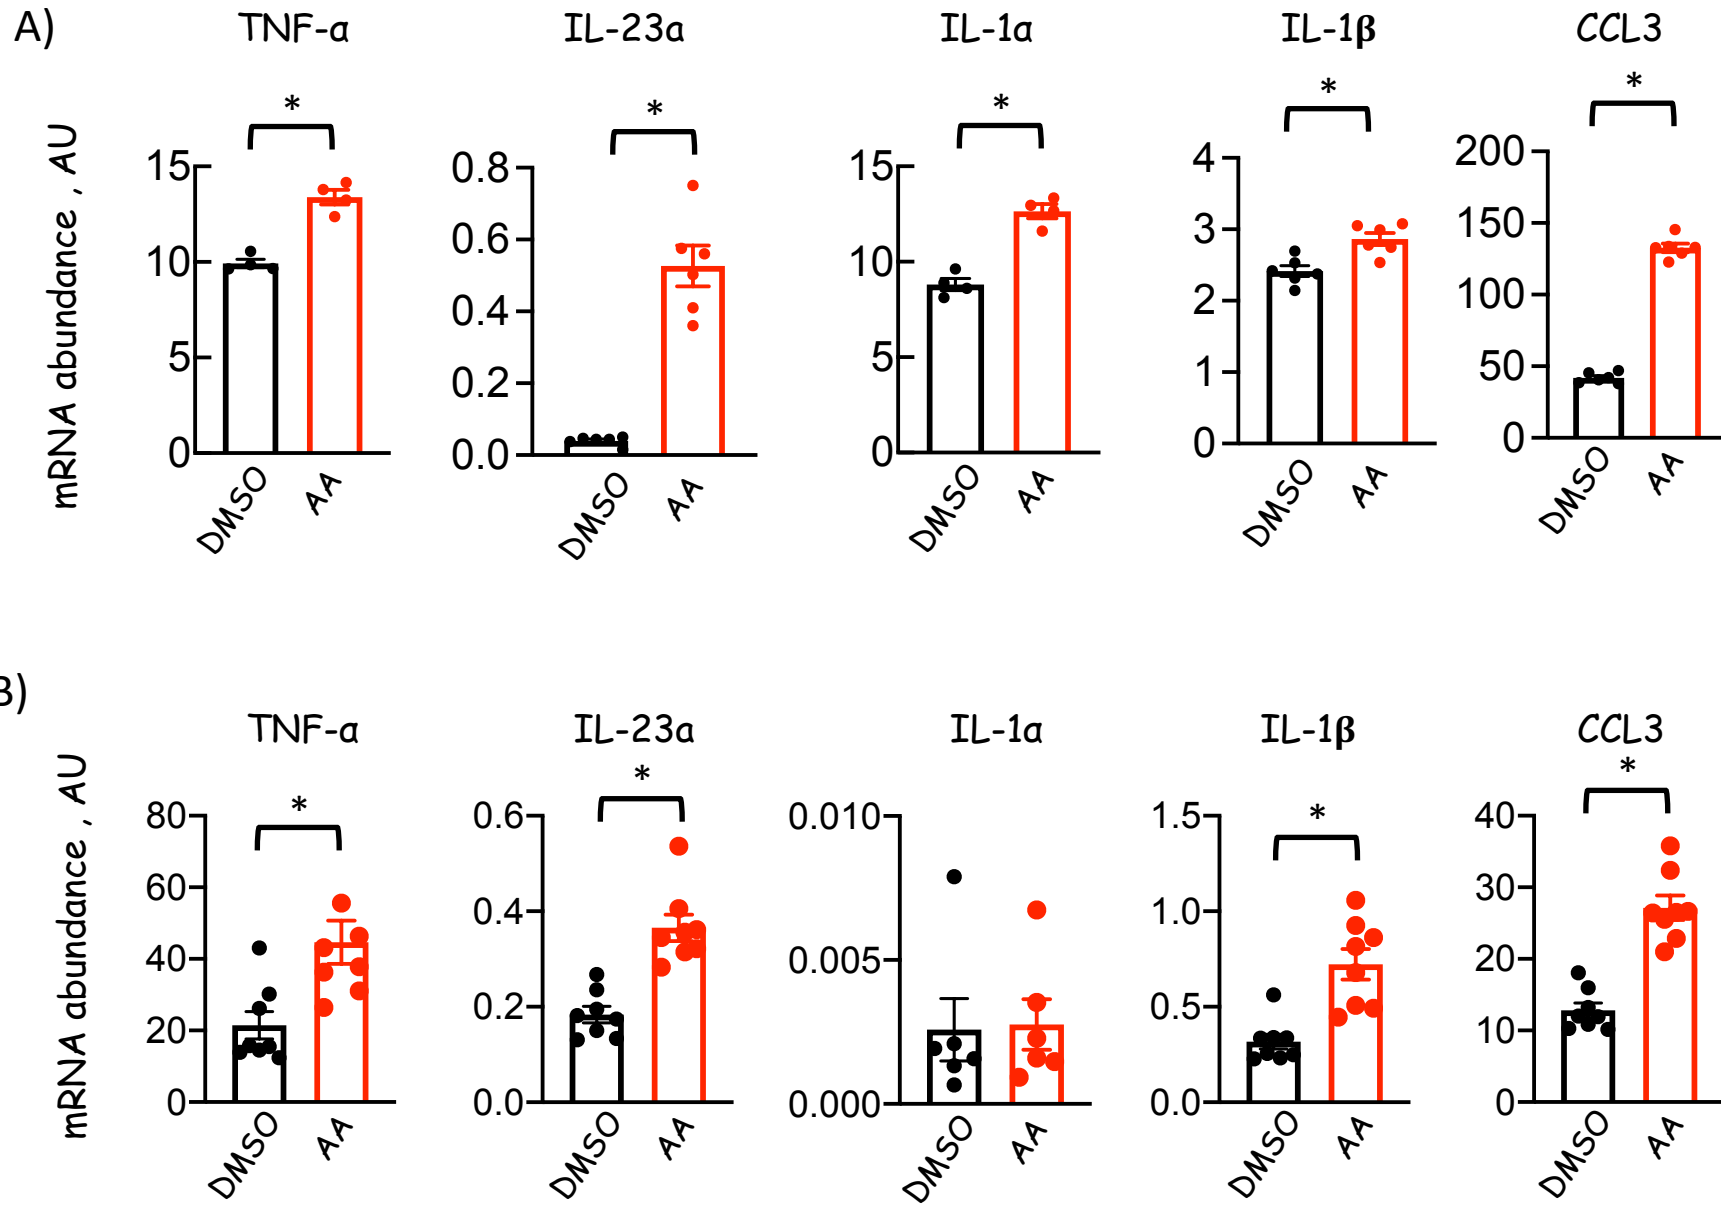

# Supplemental Figure 2

IRF4 expression,  
Renal macrophages

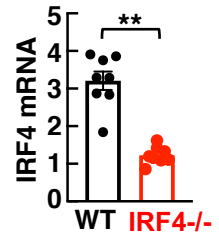

# Supplemental Figure 3

## A) Annexin V and ROS analysis, Peritoneal Macrophage + AA (3.5 $\mu$ M)

### Gating strategy

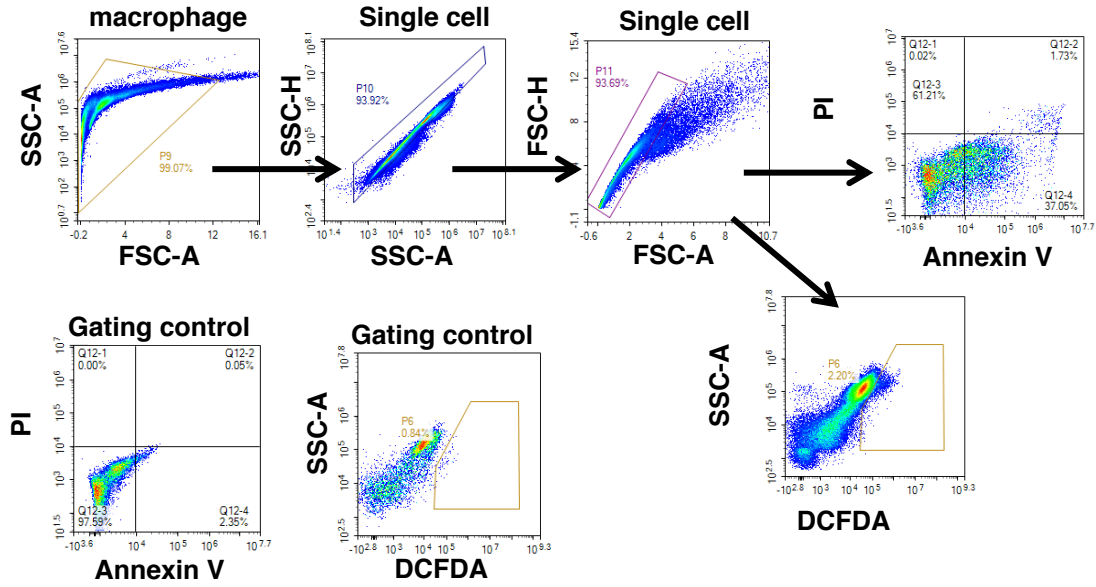

B)

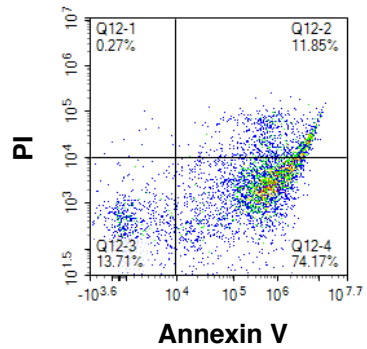

C)

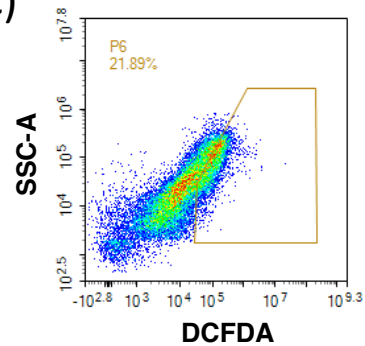

# Supplemental Figure 4

## A) Gating strategy, Kidney tissue

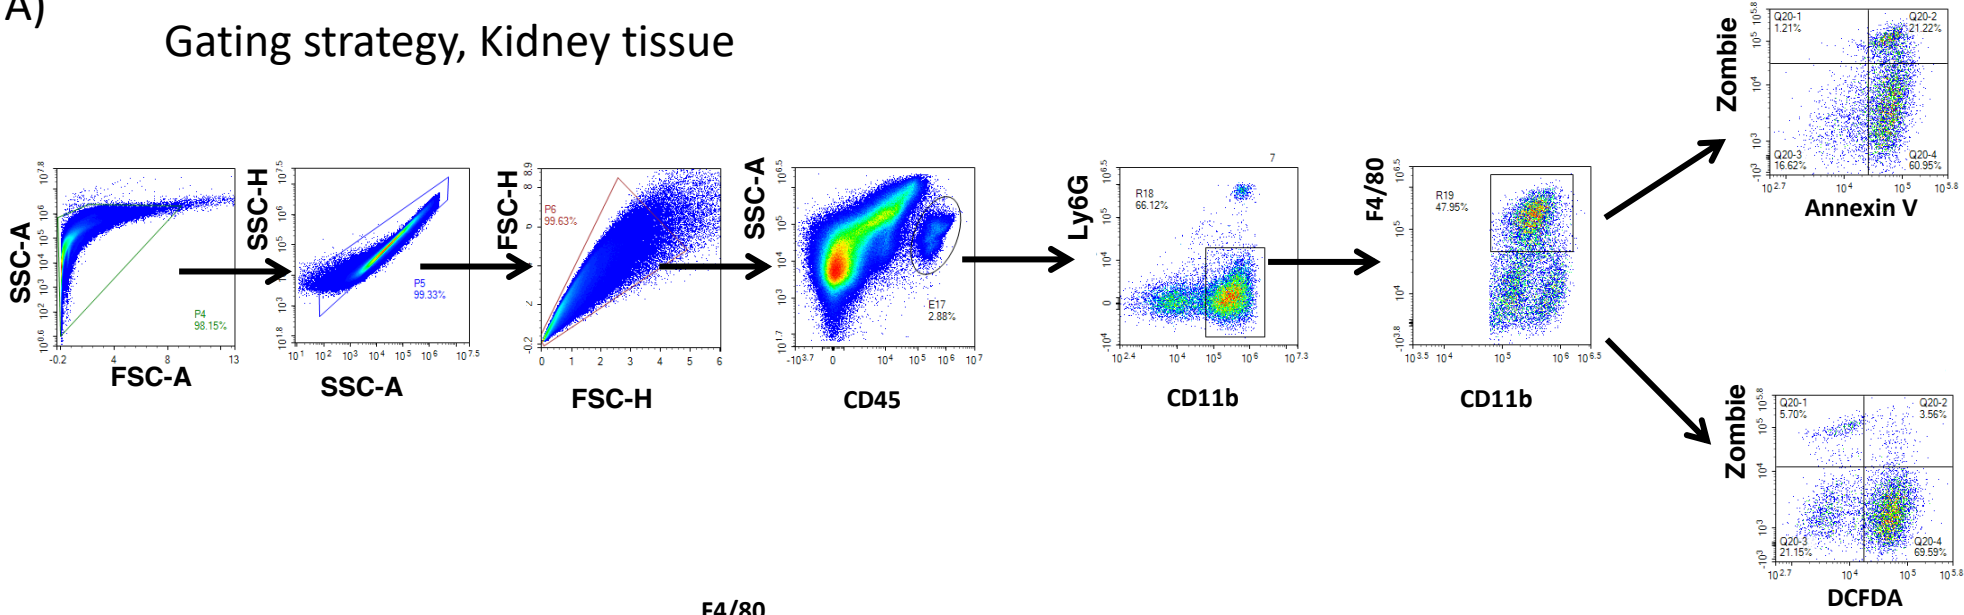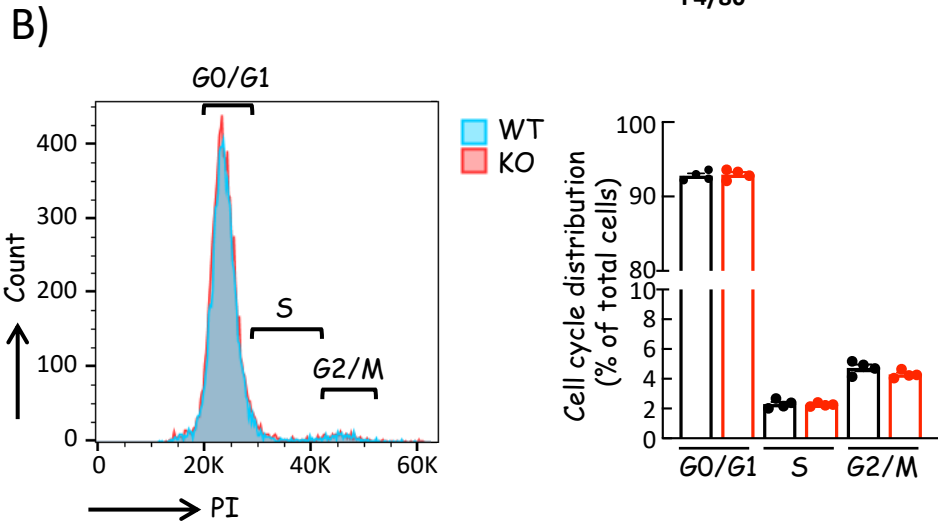

Supplemental Figure 5

Control

IRF4<sup>-/-</sup>

CD3

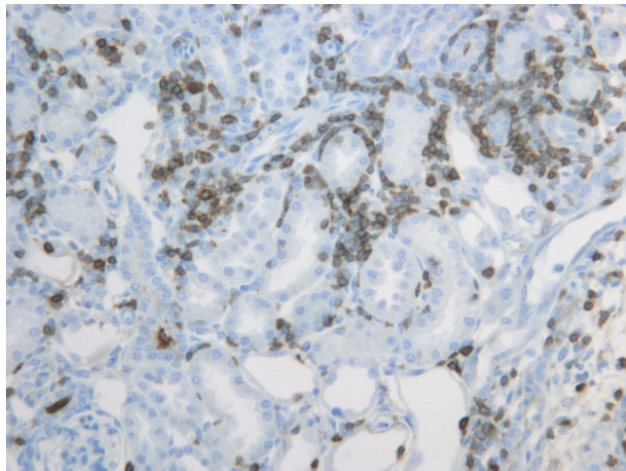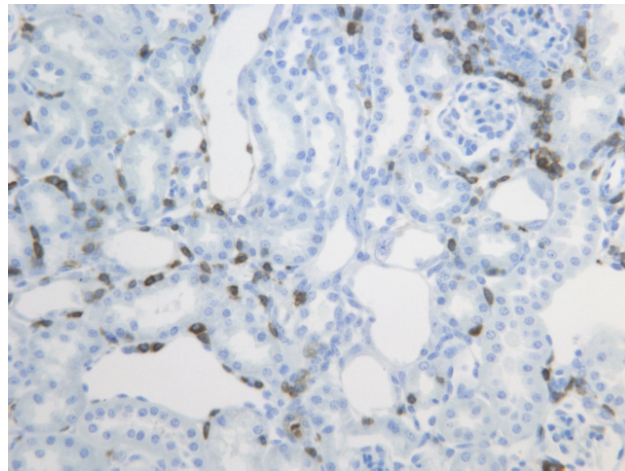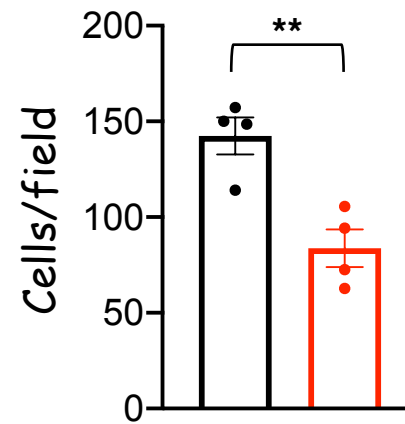

Supplement: jciinsight-7-150723-s099.pdf [file jciinsight-7-150723-s099.pdf]
